# Supplementary material for: Smad4 controls signaling robustness and morphogenesis by differentially contributing to the Nodal and BMP pathways
Source: PubMed Central journal article supplement (PMC8569018; doi:10.1038/s41467-021-26486-3), 2021-11-04
Supplement: 41467_2021_26486_MOESM1_ESM.pdf [file 41467_2021_26486_MOESM1_ESM.pdf]

# **Smad4 controls signaling robustness and morphogenesis by differentially contributing to the Nodal and BMP pathways**

Guglielmi et al

## **Supplementary Tables and Figures**

**Supplementary Fig. 1.** The mutant phenotype is specific to the loss of *smad4a*.

**Supplementary Fig. 2.** scRNA-seq reveals the pseudo-spatial expression pattern of BMP and Nodal components at the onset of gastrulation.

**Supplementary Fig. 3.** BMP target gene expression is dependent on Smad4a, but Nodal target gene expression is mostly independent of Smad4a and Smad4b.

**Supplementary Fig. 4.** SMAD4 is differentially required for BMP and Nodal/Activin signaling in mESCs.

**Supplementary Fig. 5.** Loss of BMP signaling does not affect Nodal activity in the embryo.

**Supplementary Fig. 6.** Loss of BMP signaling dominates effects on germ layer formation and morphogenesis in MZ*smad4a* embryos.

**Supplementary Fig. 7.** OPT images for embryos treated with different doses of DMH1.

**Supplementary Fig. 8.** Defining BMP morphospace.

**Supplementary Table 1.** List of oligonucleotides.

**Supplementary Table 2.** Key resources

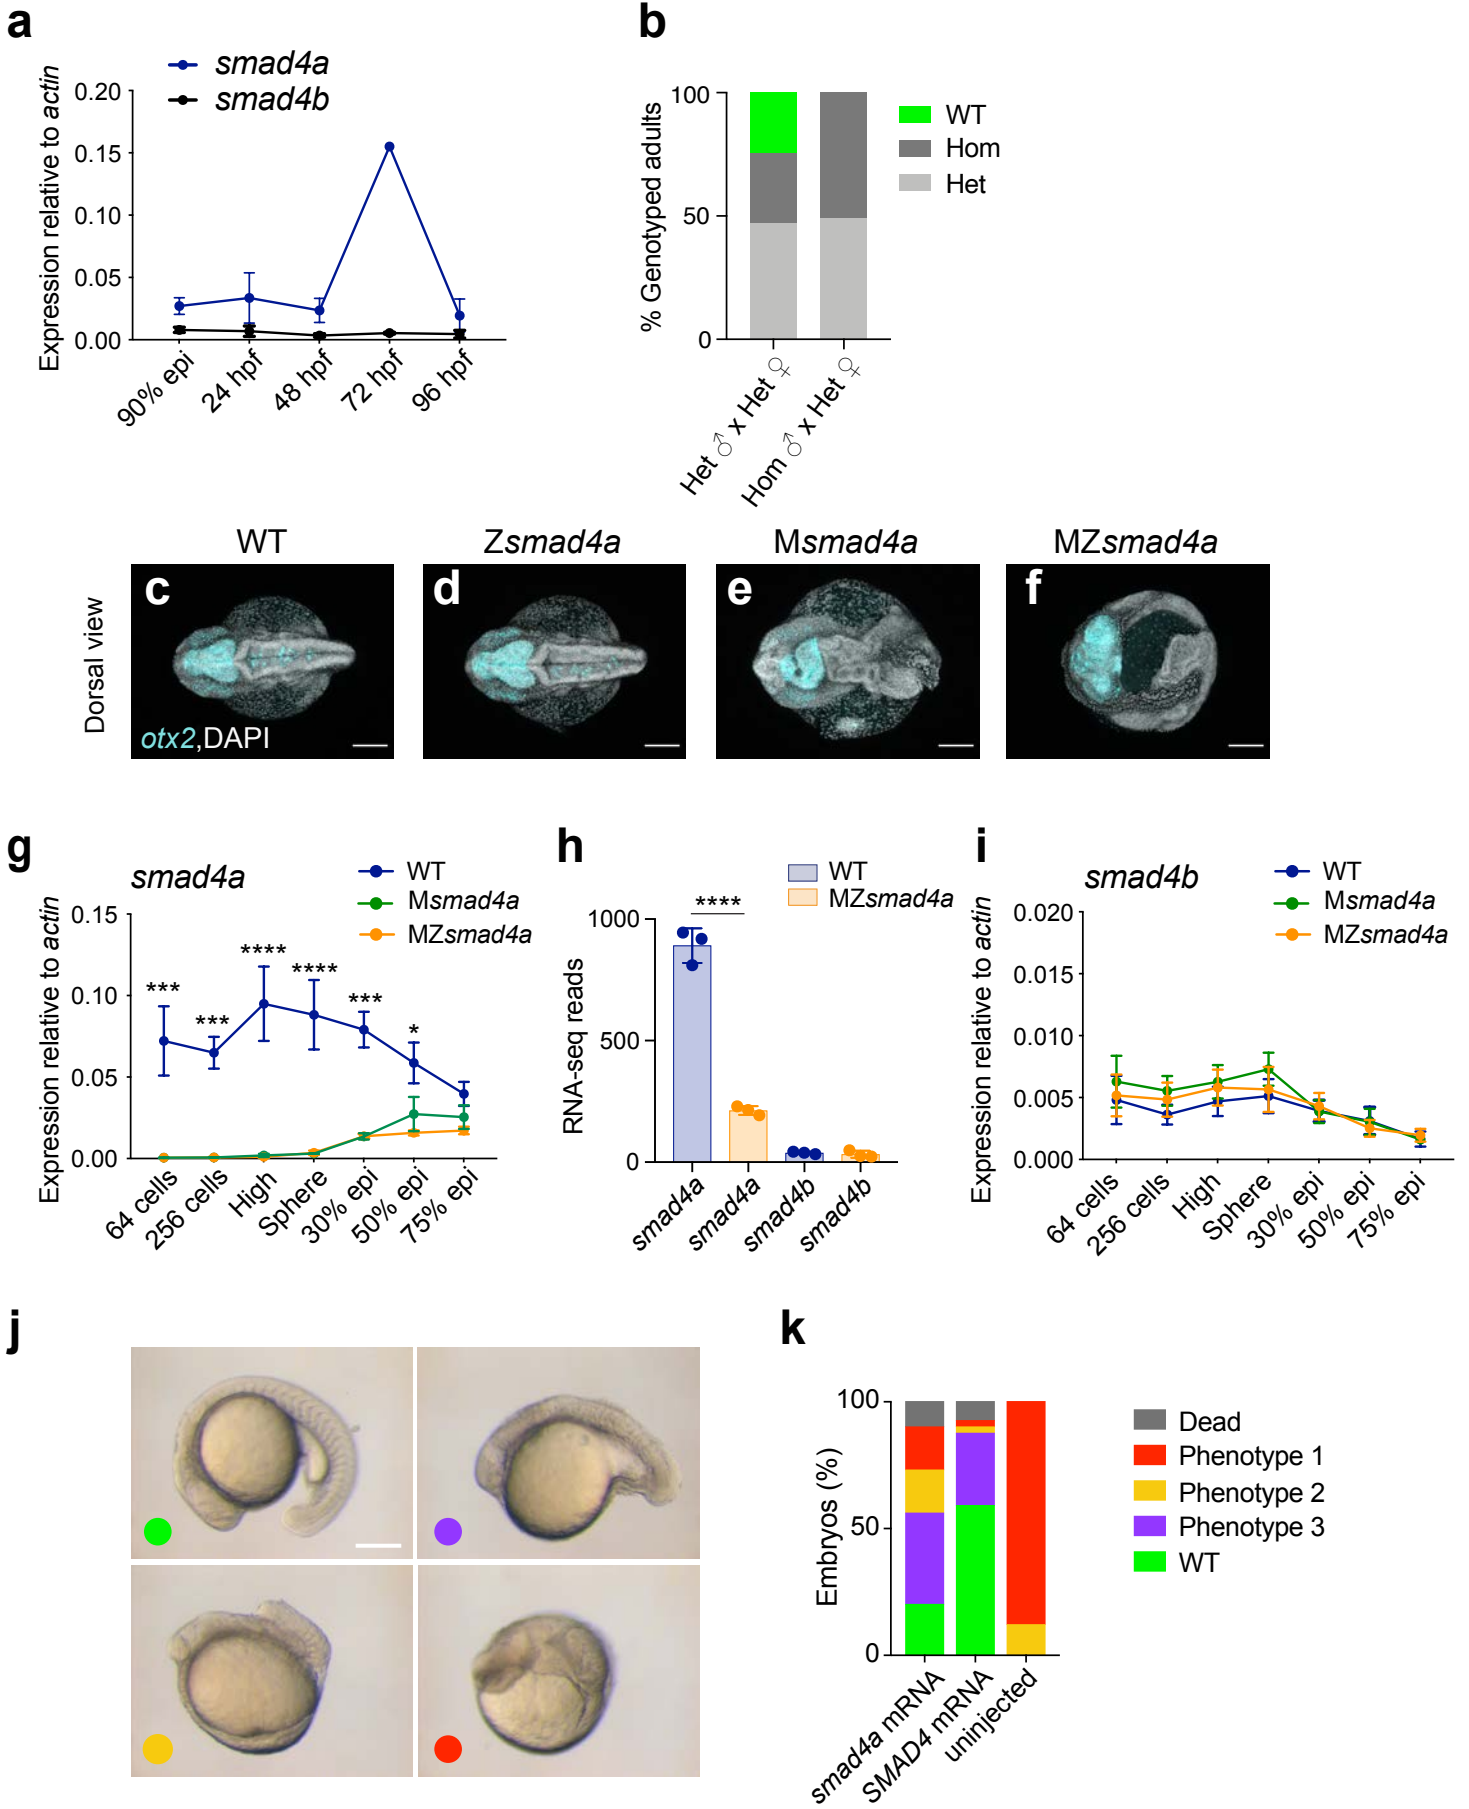

**Supplementary Fig. 1. The mutant phenotype is specific to the loss of *smad4a*.** **a** qPCR for *smad4a* and *smad4b* mRNA in WT embryos at the stages indicated. Means  $\pm$  SEM are shown for 2 biological replicates for each timepoint. **b** Quantitation of zygotic *smad4a* mutants reaching adulthood. Parental crosses and genotypes are indicated. **c–f** Anterior views of double-FISH-stained 24-hpf WT (**c**), *Zsmad4a* (**d**), *Msmad4a* (**e**) and *MZsmad4a* (**f**) embryos shown in Fig. 1d–g where only the *otx2* staining is shown (cyan). Nuclei are stained with DAPI (white). Scale bar corresponds to 150  $\mu$ m. Images in **c–f** are representative of 25 embryos each and 4 independent experiments. **g** qPCR for *smad4a* mRNA in WT, *Msmad4a* and *MZsmad4a* embryos at the stages indicated. Means  $\pm$  SEM are shown for four biological replicates for each timepoint and each genotype. The WT data shown are the same as Fig. 1a for comparison. The statistics are only shown for the WT and *MZsmad4a* comparison. 64 cells:  $p(\text{adj}) = 3.837 \times 10^{-4}$ , 256 cells:  $p(\text{adj}) = 9.951 \times 10^{-4}$ , High:  $p(\text{adj}) = 6,377 \times 10^{-6}$ , Sphere:  $p(\text{adj}) = 3.532 \times 10^{-5}$ , 30% epiboly:  $p(\text{adj}) = 9,951 \times 10^{-4}$ , 50% epiboly:  $p(\text{adj}) = 0.023$ . Unpaired multiple comparison t-test with Holm-Sidak correction. \*,  $p < 0.05$ ; \*\*\*,  $p < 0.001$ ; \*\*\*\*,  $p < 0.0001$ . **h** RNA-seq reads for *smad4a* and *smad4b* mRNA in WT and *MZsmad4a* embryos. Note that values for *smad4a* are the same as those shown in Fig. 1h to allow comparison. Means  $\pm$  SD are shown from three biological replicates for each genotype.  $p(\text{adj}) = 2.132 \times 10^{-35}$ . Wald test. \*\*\*\*,  $p(\text{adj}) < 0.0001$ . **i** qPCR for *smad4b* mRNA in WT, *Msmad4a* and *MZsmad4a* embryos at the stages indicated. Means  $\pm$  SEM are shown for four biological replicates for each timepoint and each genotype. The WT data shown are the same as in Fig. 1a for comparison. **j** Representative images of rescued *MZsmad4a* embryos. Colored dots refer to different degrees of rescue as quantified in **k**. Scale bar corresponds to 300  $\mu$ m. **k** Quantitation of the phenotypes in zebrafish embryos injected with either human *SMAD4* mRNA or zebrafish *smad4a* mRNA. Colors refer to the different phenotypes shown in **j**.

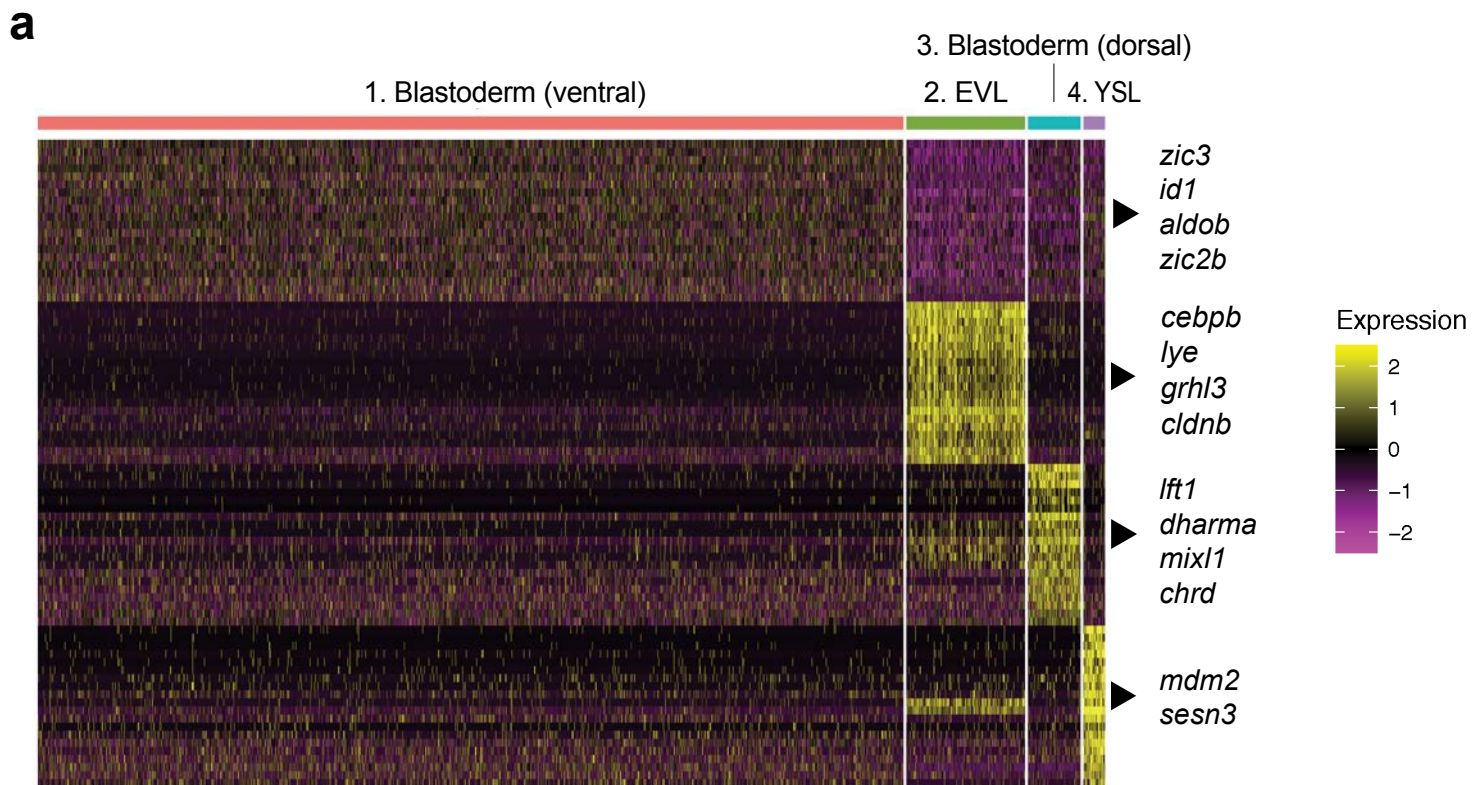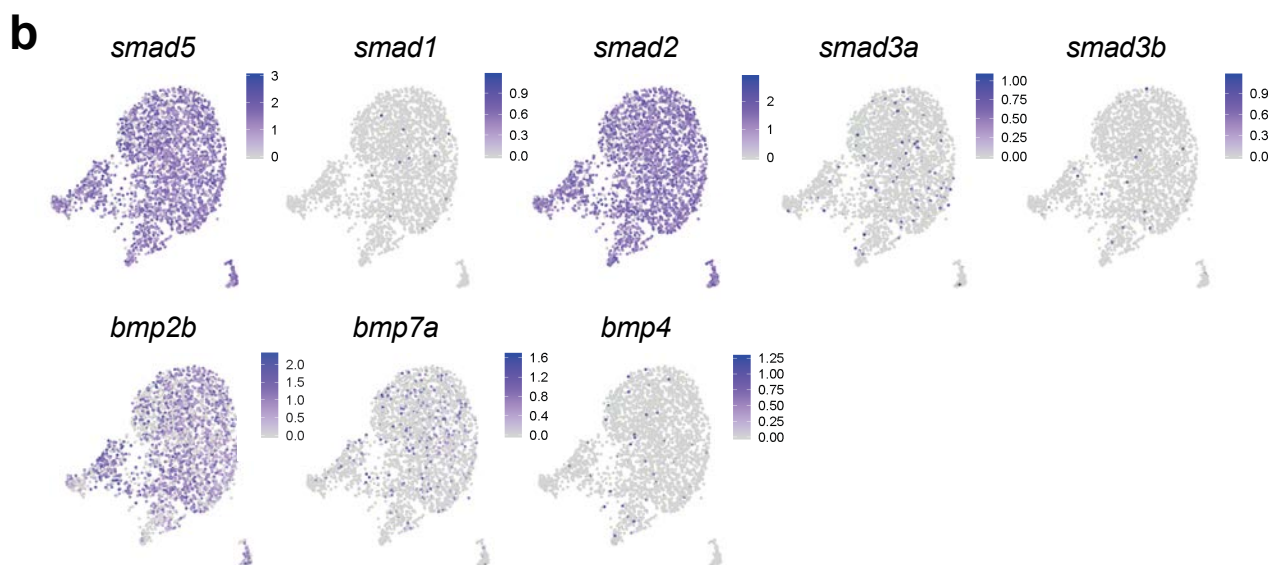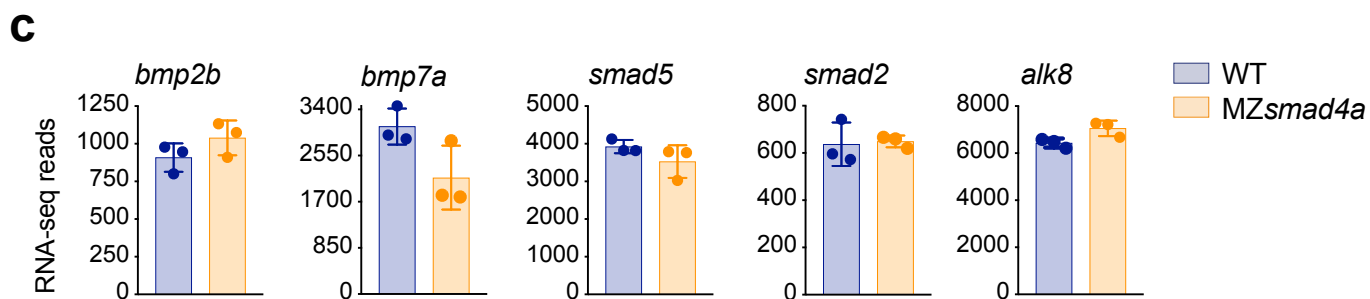

**Supplementary Fig. 2. scRNA-seq reveals the pseudo-spatial expression pattern of BMP and Nodal components at the onset of gastrulation.** **a** Heatmap representing the 4 different clusters shown in Fig. 1b. The genes used for cluster definition are indicated. **b** Uniform manifold approximation and projection (UMAP) visualization of single cells derived from sphere stage zebrafish embryos, showing expression of Nodal and BMP pathway components. Normalized counts are shown. **c** RNA-seq reads for Nodal and BMP pathway components at 50% epiboly in WT and MZ*smad4a* mutant embryos. Means  $\pm$  SD are shown from 3 biological replicates for each genotype. Wald test.  $p(\text{adj}) > 0.01$  for all markers.

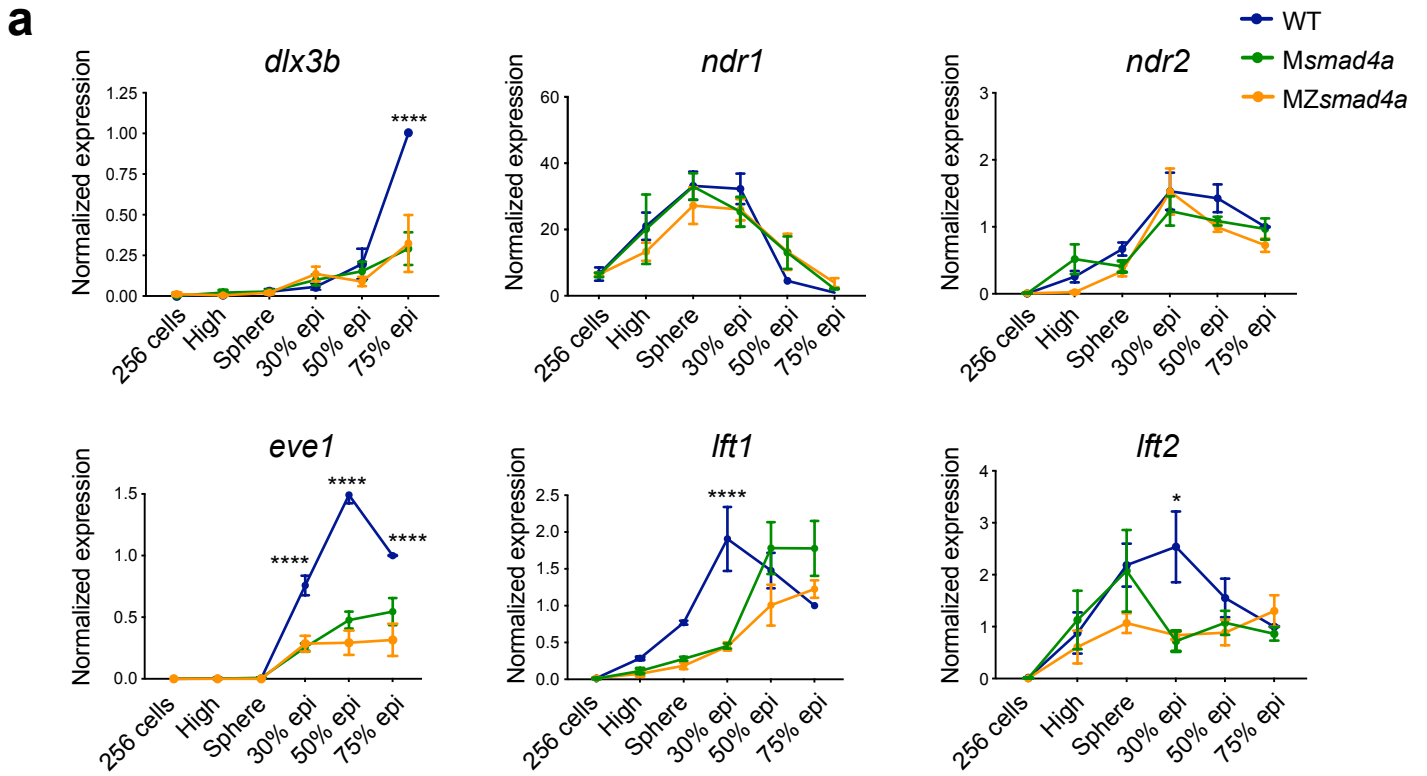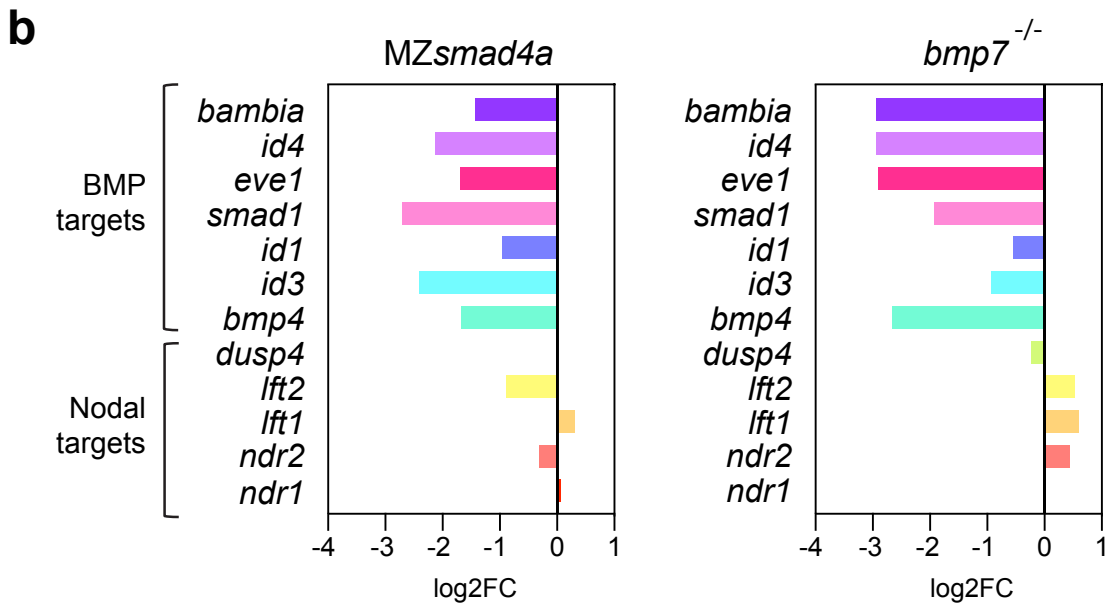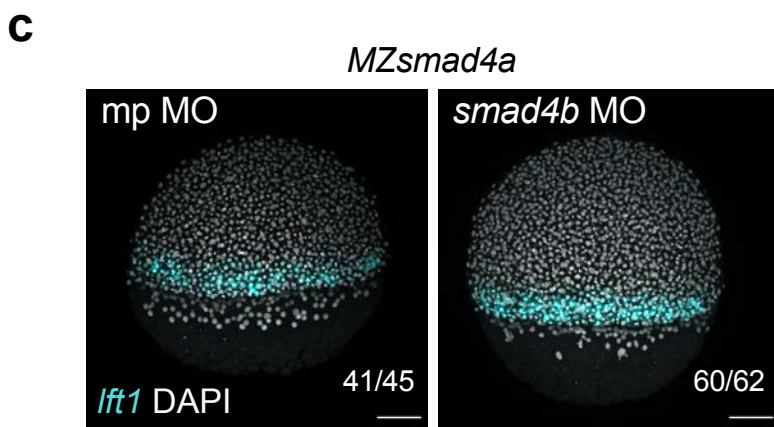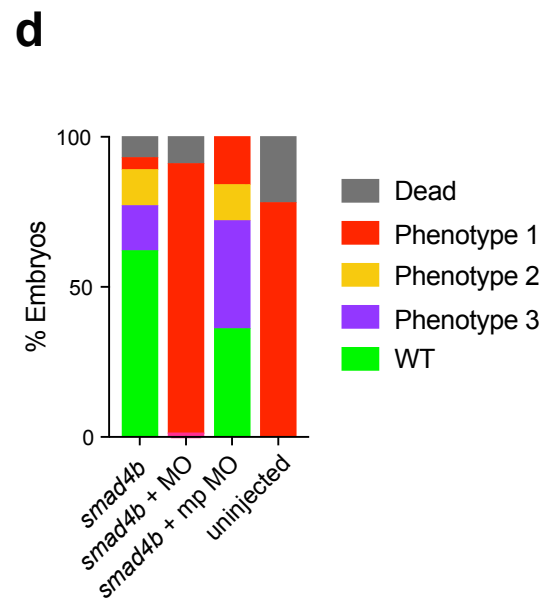

**Supplementary Fig. 3. BMP target gene expression is dependent on Smad4a, but Nodal target gene expression is mostly independent of Smad4a and Smad4b.** **a** qPCR for *dlx3b*, *ndr1*, *ndr2*, *eve1*, *lft1* and *lft2* mRNA in WT, *Msmad4a* and *MZsmad4a* embryos at the stages indicated. Means  $\pm$  SEM are shown. The data for *ndr1/2* are the result of 3 biological replicates while for *lft1/2* they are the result of 4 biological replicates, except for *lft1* in *MZsmad4a* at sphere stage and *lft2* in WT at 30% epiboly, which are the result of 3 biological replicates. The data for *eve1* and *dlx3b* are the result of 4 biological replicates, except for *dlx3b* in WT at 30% epiboly and *eve1* in *Msmad4a* at 30% epiboly, which are the result of 3 biological replicates. Statistics are shown for the comparison between WT and *Msmad4a*. *dlx3b* 75% epiboly:  $p(\text{adj}) = 4.207 \times 10^{-12}$ , *eve1* 30% epiboly:  $p(\text{adj}) = 4.811 \times 10^{-7}$ , *eve1* 50% epiboly:  $p(\text{adj}) = 1.0 \times 10^{-15}$ , *eve1* 75% epiboly:  $p(\text{adj}) = 6.182 \times 10^{-7}$ , *lft1* 30% epiboly:  $p(\text{adj}) = 9.746 \times 10^{-5}$ , *lft2* 30% epiboly:  $p(\text{adj}) = 0.024$ . Unpaired multiple comparison T-test with Holm-Sidak correction. \*,  $p < 0.05$ ; \*\*\*\*,  $p < 0.0001$ . Note that for *lft1/2* and *ndr1/2* the WT and *MZsmad4a* traces are the same as in Fig. 2c for comparison purposes. See Fig. 2c for the statistics for this comparison. **b** RNA-seq data for BMP and Nodal target genes in *MZsmad4a* (left panel) and *bmp7<sup>-/-</sup>* (right panel) embryos compared to their respective WT controls. Data are expressed as log<sub>2</sub>FC, obtained by the comparison of mutant embryos replicates with their respective WT controls. The signaling pathways are indicated, as are the specific markers. **c** ISH for *lft1* in *MZsmad4a* embryos. Embryos were injected either with *smad4b* miss-paired (mp) MO or with the *smad4b* MO as indicated. Scale bar corresponds to 100  $\mu\text{m}$ . Nuclei were stained with DAPI (white). **d** Quantitation of *MZsmad4a* embryos injected with *smad4b* mRNA  $\pm$  *smad4b* MO or *smad4b* mp MO or uninjected. Colors refer to phenotypes in Supplementary Fig. 1j.

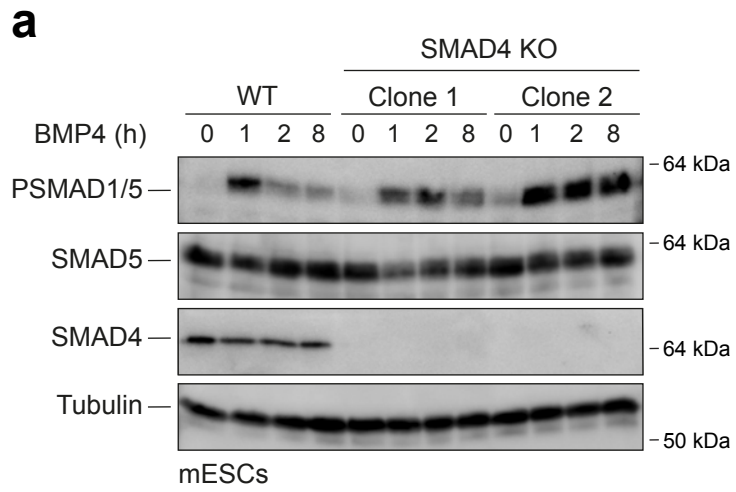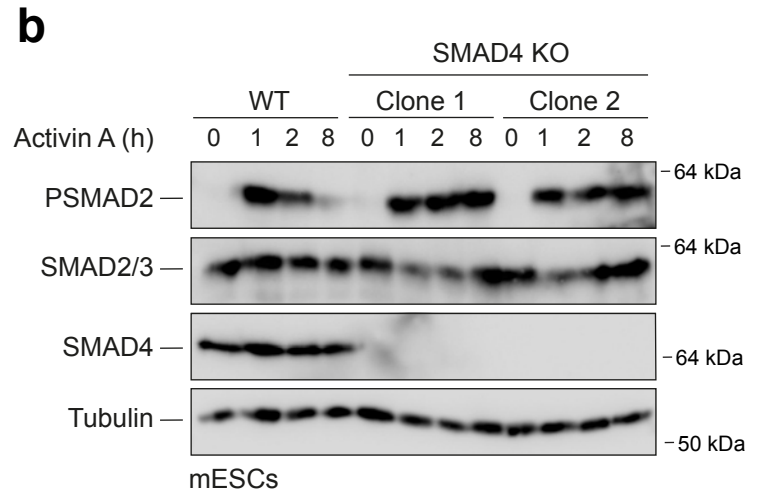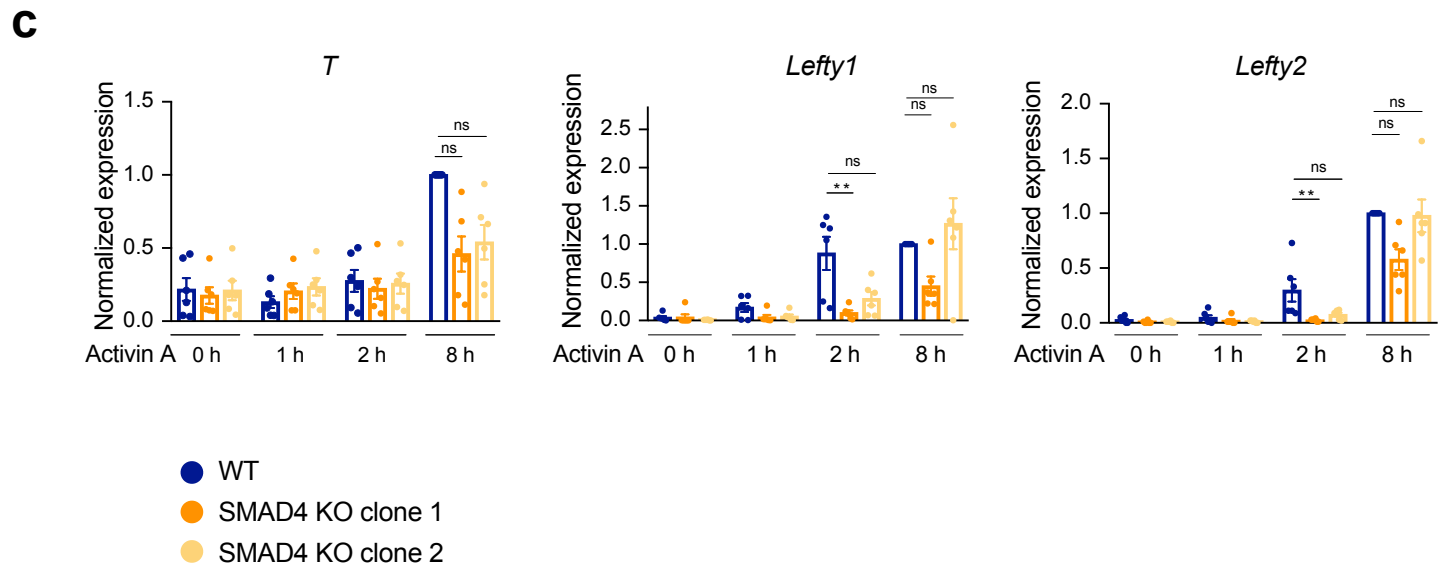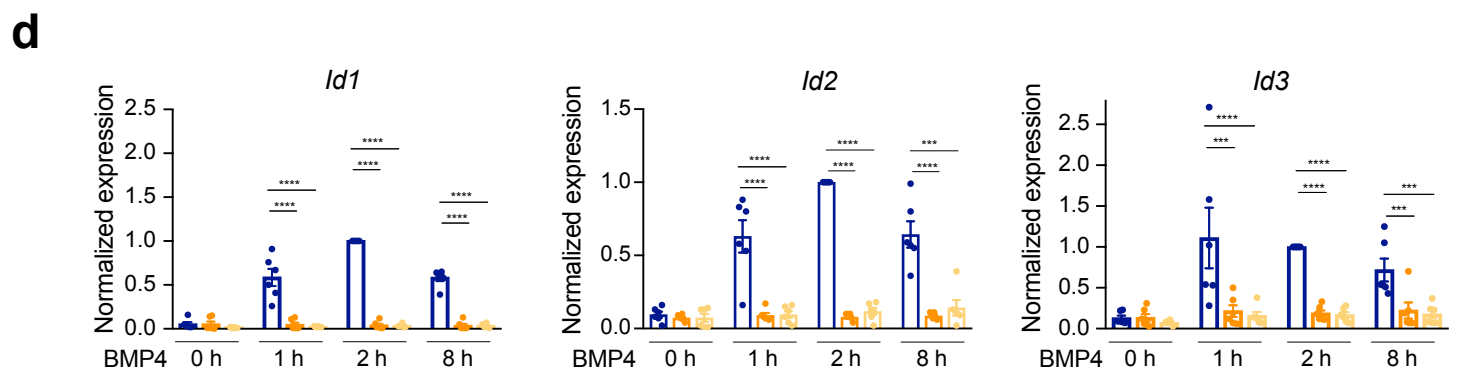



**Supplementary Fig. 4. SMAD4 is differentially required for BMP and Nodal/Activin signaling in mESCs.** **a** Immunoblot of whole cell lysates of parental and two SMAD4 KO mESC clones upon different duration of 20 ng/ml BMP4 stimulation. Antibodies used are indicated for each panel. **b** As in **a** but cells were treated for the times indicated with 20 ng/ml Activin A. Immunoblots are representative of 3 independent experiments. Molecular weight markers are given in kDa on the right of the blots. **c** qPCR for *T*, *Lefty2* and *Lefty1* after different durations of Activin A stimulation. Means  $\pm$  SEM are shown. The data for *Lefty1*, *Lefty2* and *T* are the result of 6 biological replicates. *Lefty1* WT vs. SMAD4 KO clone 1 at 2 h Activin A:  $p(\text{adj}) = 0.004$ . *Lefty2* WT vs SMAD4 KO clone 1 at 2 h Activin A:  $p(\text{adj}) = 0.001$ . Two-way Anova and Tukey post hoc test. \* $p < 0.05$ ; \*\* $p < 0.01$ ; ns, not significant. **d** qPCR for *Id1*, *Id2* and *Id3* after different durations of BMP4 stimulation. Means  $\pm$  SEM are shown. The data for *Id1/2/3* are the result of 6 biological replicates.  $p(\text{adj}) < 0.0001$  for all comparisons between WT vs. SMAD4 KO clone1/2 for all genes, except for *Id2* (WT vs. SMAD4 KO clone 2 at 8 h BMP4) and *Id3* (WT vs. SMAD4 KO clone 1 at 1 h BMP4, WT vs. SMAD4 KO clone 1/2 at 8 h BMP4) for which  $p(\text{adj}) < 0.001$ . Two-way Anova and Tukey post hoc test. \*\*\* $p < 0.001$ ; \*\*\*\* $p < 0.0001$ .

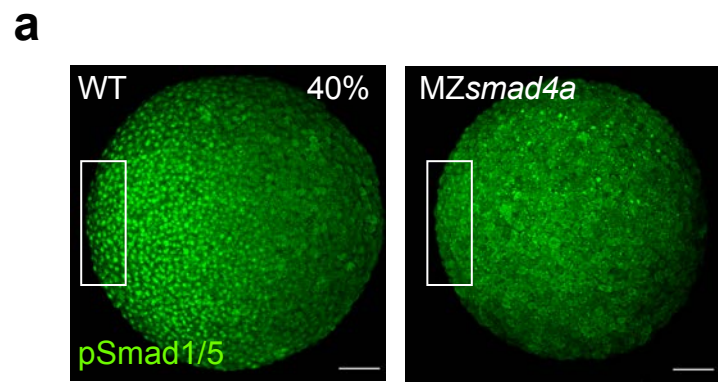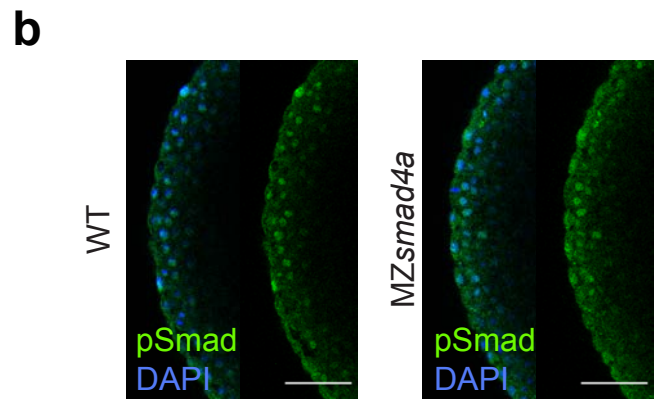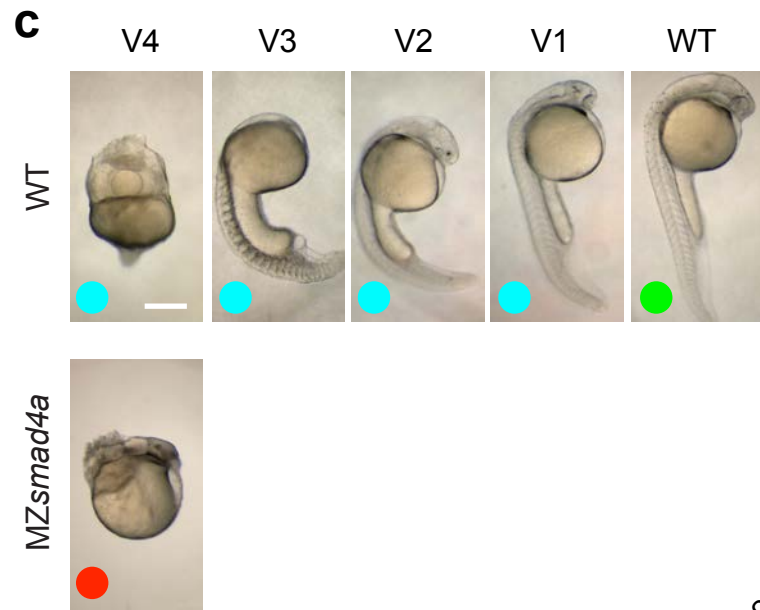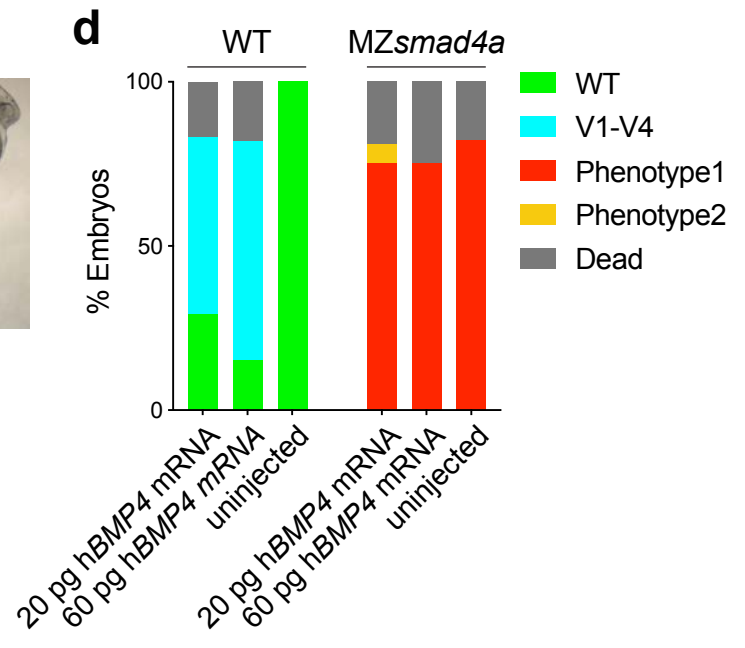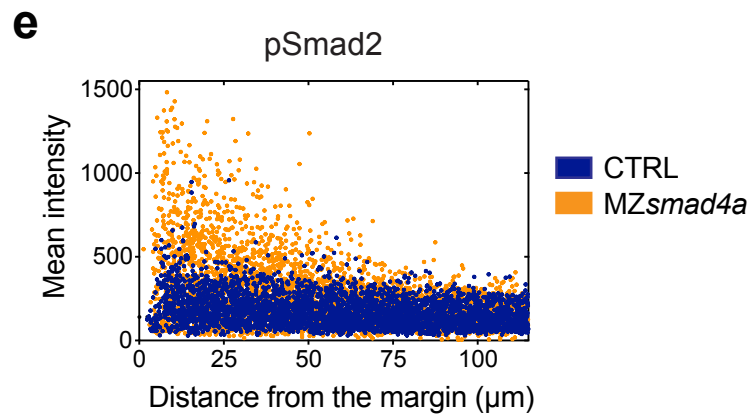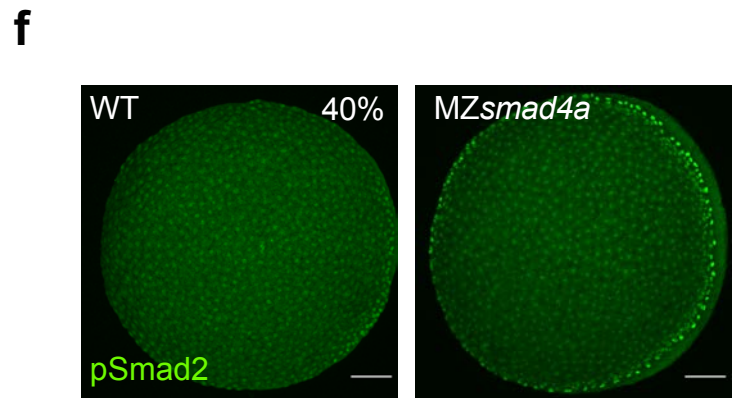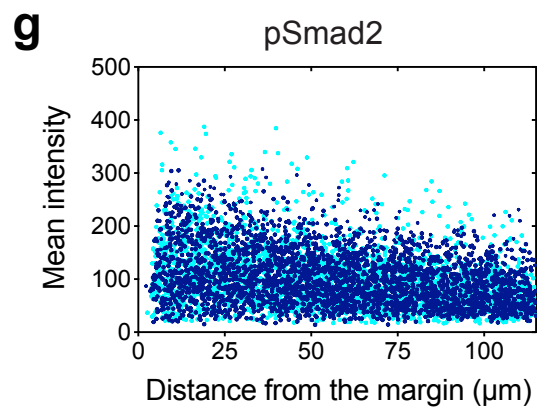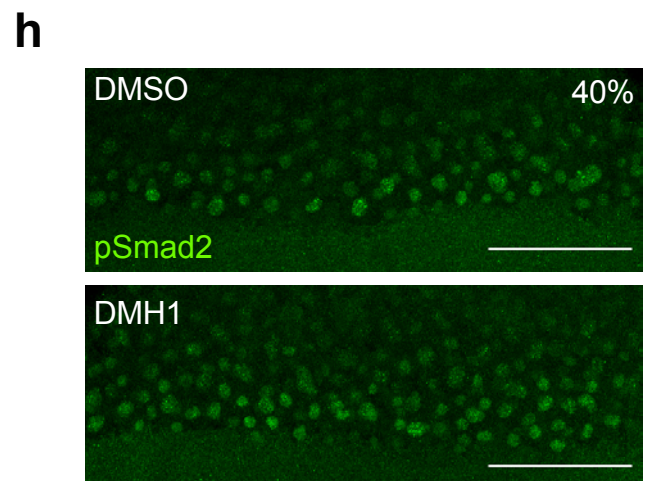

**Supplementary Fig. 5. Loss of BMP signaling does not affect Nodal activity in the embryo.** **a** MIP showing immunostaining for pSmad1/5 in WT and MZ*smad4a* embryos at 40% epiboly. Scale bars correspond to 100  $\mu\text{m}$ . Immunostaining is representative of 3 embryos and 2 independent experiments **b** Enlargement of white panels in **a** for WT and MZ*smad4a* mutant embryos. Nuclei were stained with DAPI (blue). Note the pSmad1/5-positive nuclei. Scale bars correspond to 80  $\mu\text{m}$ . **c** Representative images of WT and MZ*smad4a* embryos injected with h*BMP4* mRNA. Colored dots refer to the different phenotypes. Scale bar corresponds to 300  $\mu\text{m}$  (**d**). **d** Quantitation of WT and MZ*smad4a* embryos injected with either 20 or 60 pg of h*BMP4* mRNA. Colors refer to phenotypes in Supplementary Fig. 1j. **e** Raw data related to Figs 4h, i; orange and dark blue dots indicate segmented cell intensities from CTRL and MZ*smad4a* embryos. n=8 embryos for each group. **f** MIP showing immunostaining for pSmad2 in WT and MZ*smad4a* embryos at 40% epiboly. Scale bars correspond to 100  $\mu\text{m}$ . Immunostaining is representative of 6 embryos and 3 independent experiments. **g** Quantitation of **h** where dark blue and cyan dots show segmented cells from DMSO- and DMH1-treated embryos. n=8 embryos for each group. **h** MIP showing pSmad2 immunostaining at the margin of WT embryos treated with DMSO or 10  $\mu\text{M}$  DMH1. Scale bar corresponds to 100  $\mu\text{m}$ .

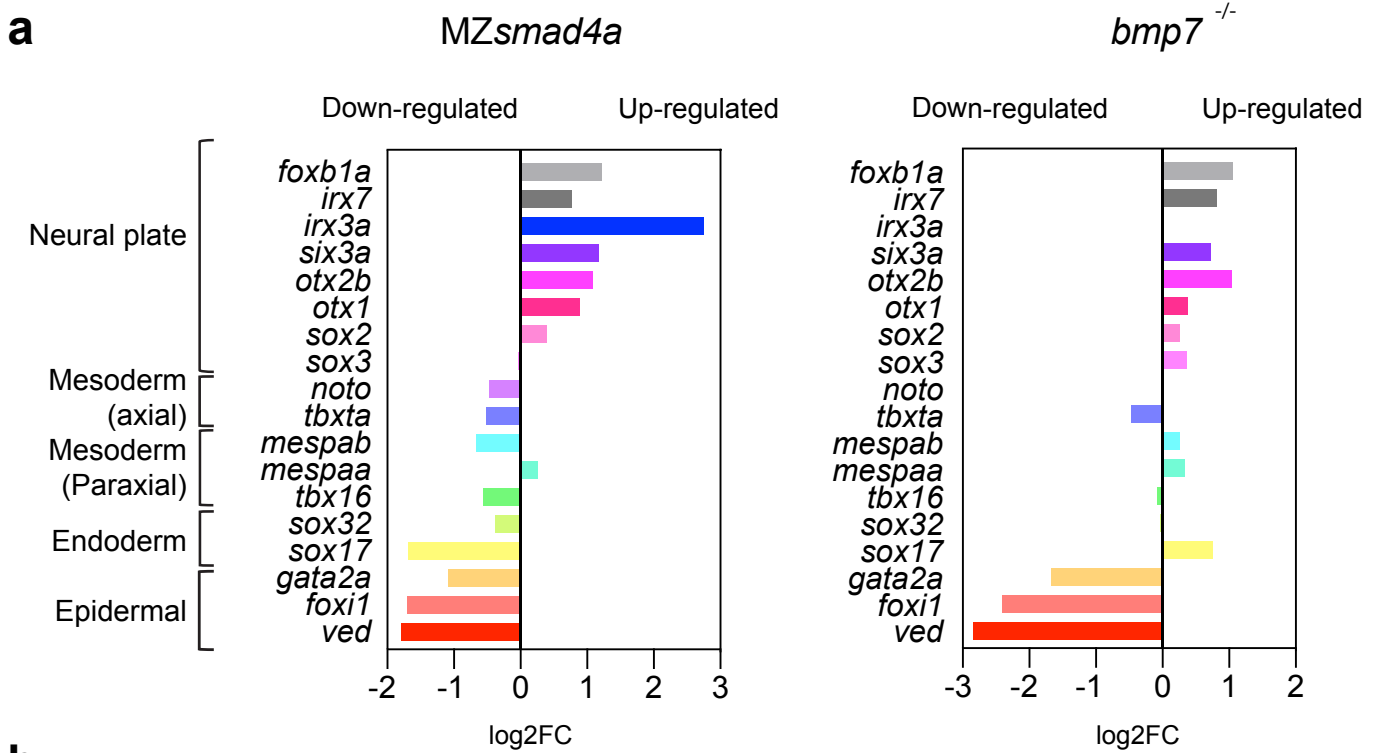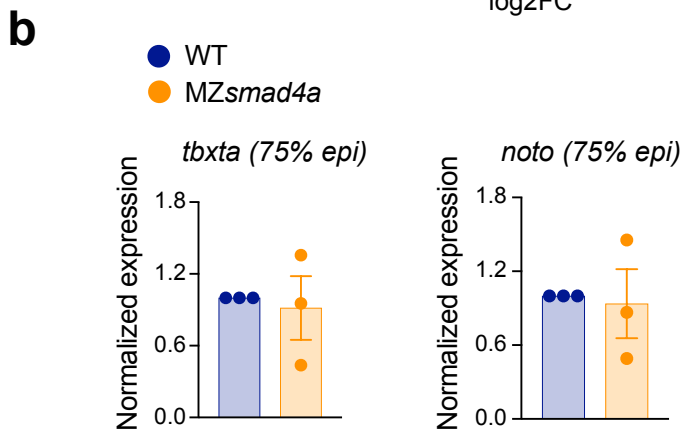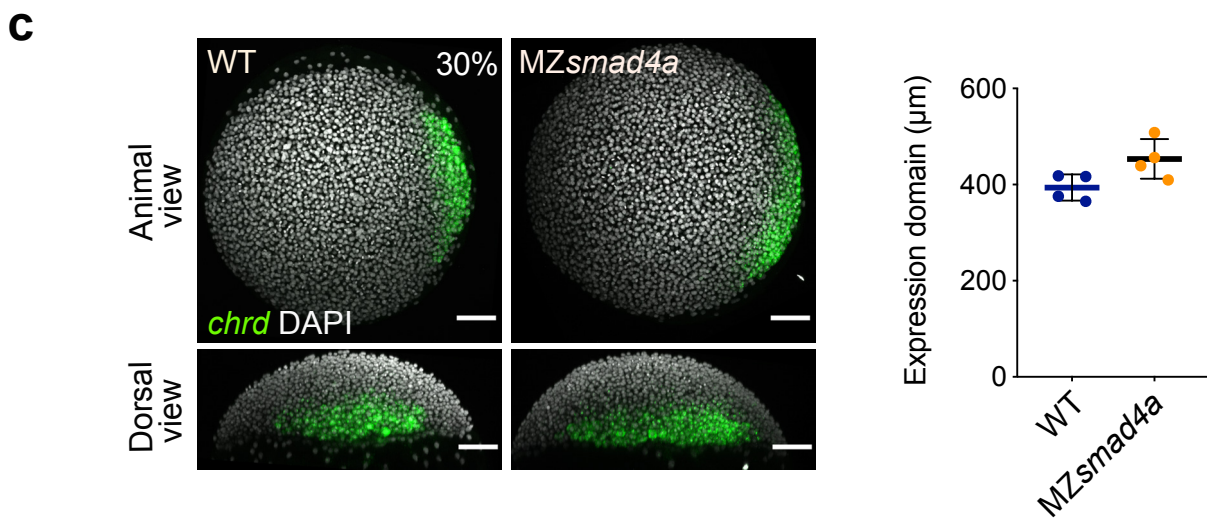

**Supplementary Fig. 6. Loss of BMP signaling dominates effects on germ layer formation and morphogenesis in MZ*smad4a* embryos.** **a** RNA-seq data (log<sub>2</sub>FC) for germ layers markers in MZ*smad4a* (left panel) and *bmp7*<sup>-/-</sup> (right panel). Data are expressed as log<sub>2</sub>FC, obtained by the comparison of mutant embryos replicates with their respective WT controls. The tissues are indicated, as are the specific markers. **b** qPCR for *tbxta* and *noto* mRNA in WT and MZ*smad4a* embryos at 75% epiboly. Normalized values are showed as means ± SEM from 3 biological replicates. *tbxta*: p = 0.780, *noto*: p = 0.843, Two-sided one sample t and Wilcoxon test. **c** FISH for *chrd* at 40% epiboly. Upper panel animal view; bottom panel dorsal view. Nuclei were stained with DAPI (white). Right panel shows quantitation of *chrd* expression in WT and MZ*smad4a* embryos. Means ± SD are shown from n=4 embryos for each group. p = 0.114, Two-sided Mann Whitney test. Scale bar corresponds to 100 μm.

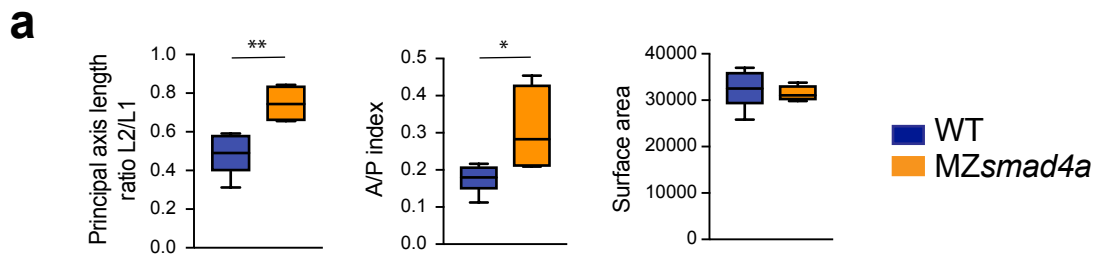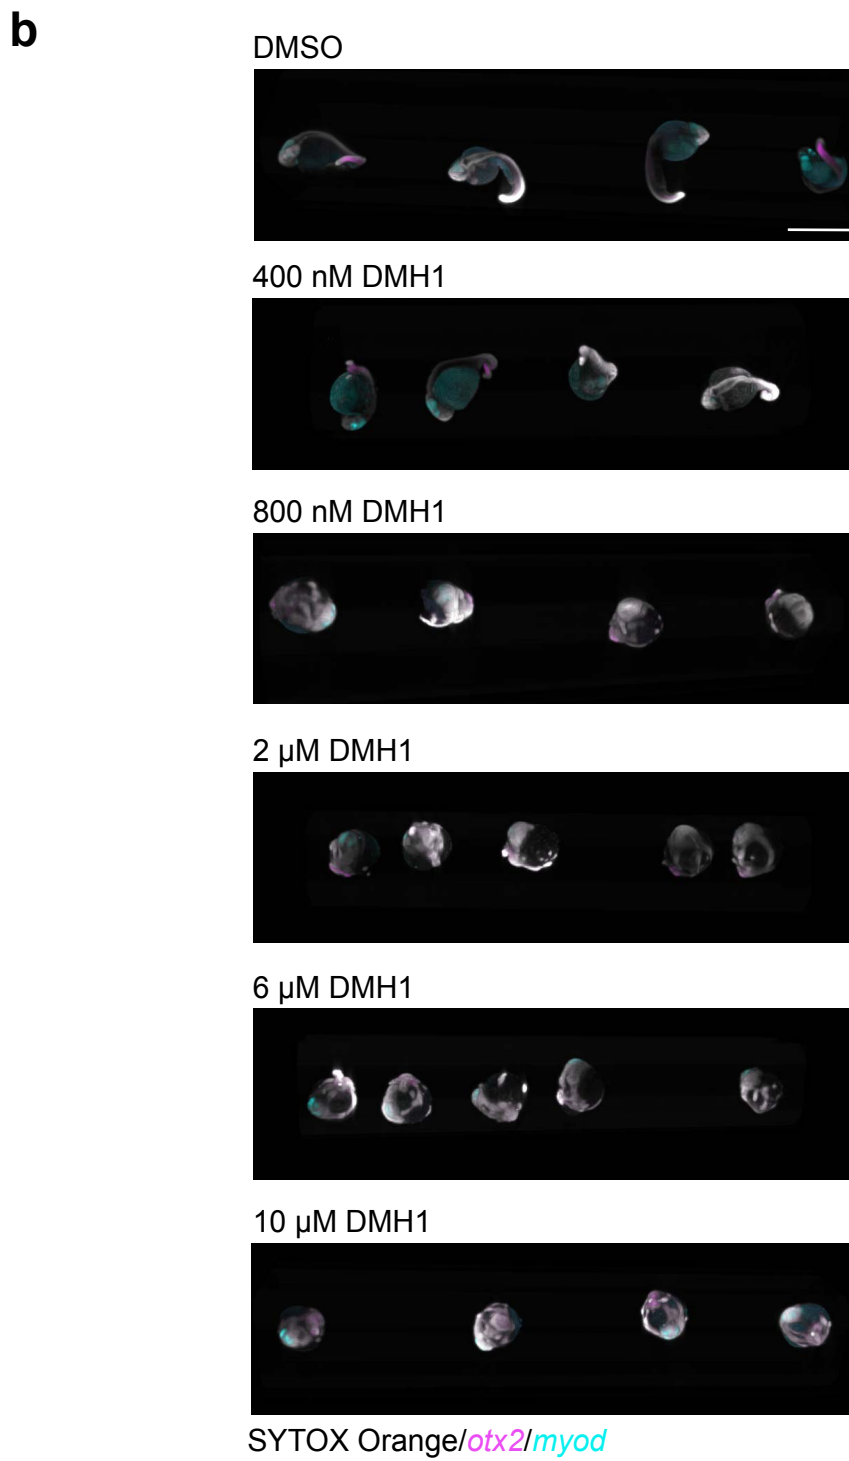

**Supplementary Fig. 7. OPT images for embryos treated with different doses of DMH1. a**

Subset of morphological descriptors from the output array (3 out of 26). Note that all measures, beside the A/P index, refer to the segmented embryo mask. Box-and-whiskers plots show WT (n=6) vs MZ*smad4a* mutants (n=4). Box at 25–75<sup>th</sup> percentile, whiskers at minimum and maximum values, line at median. Principal axis length ratio L2/L1  $p = 0.009$ , AP index  $p = 0.038$  \*,  $p < 0.05$ ; \*\*,  $p < 0.01$ , Two-sided Mann Whitney test. See also Fig. 6 and Supplementary Fig. 8. **b** Rendering of embryos treated with DMSO or different doses of DMH1 as indicated. Embryos were stained for *otx2* (cyan; anterior marker) and *myod* (magenta; posterior marker). Nuclei were labeled with SYTOX Orange. Images were acquired using OPT. Scale bar corresponds to 975  $\mu\text{m}$ . The WT (DMSO) data shown are the same as in Supplementary Movie 3 for comparison.

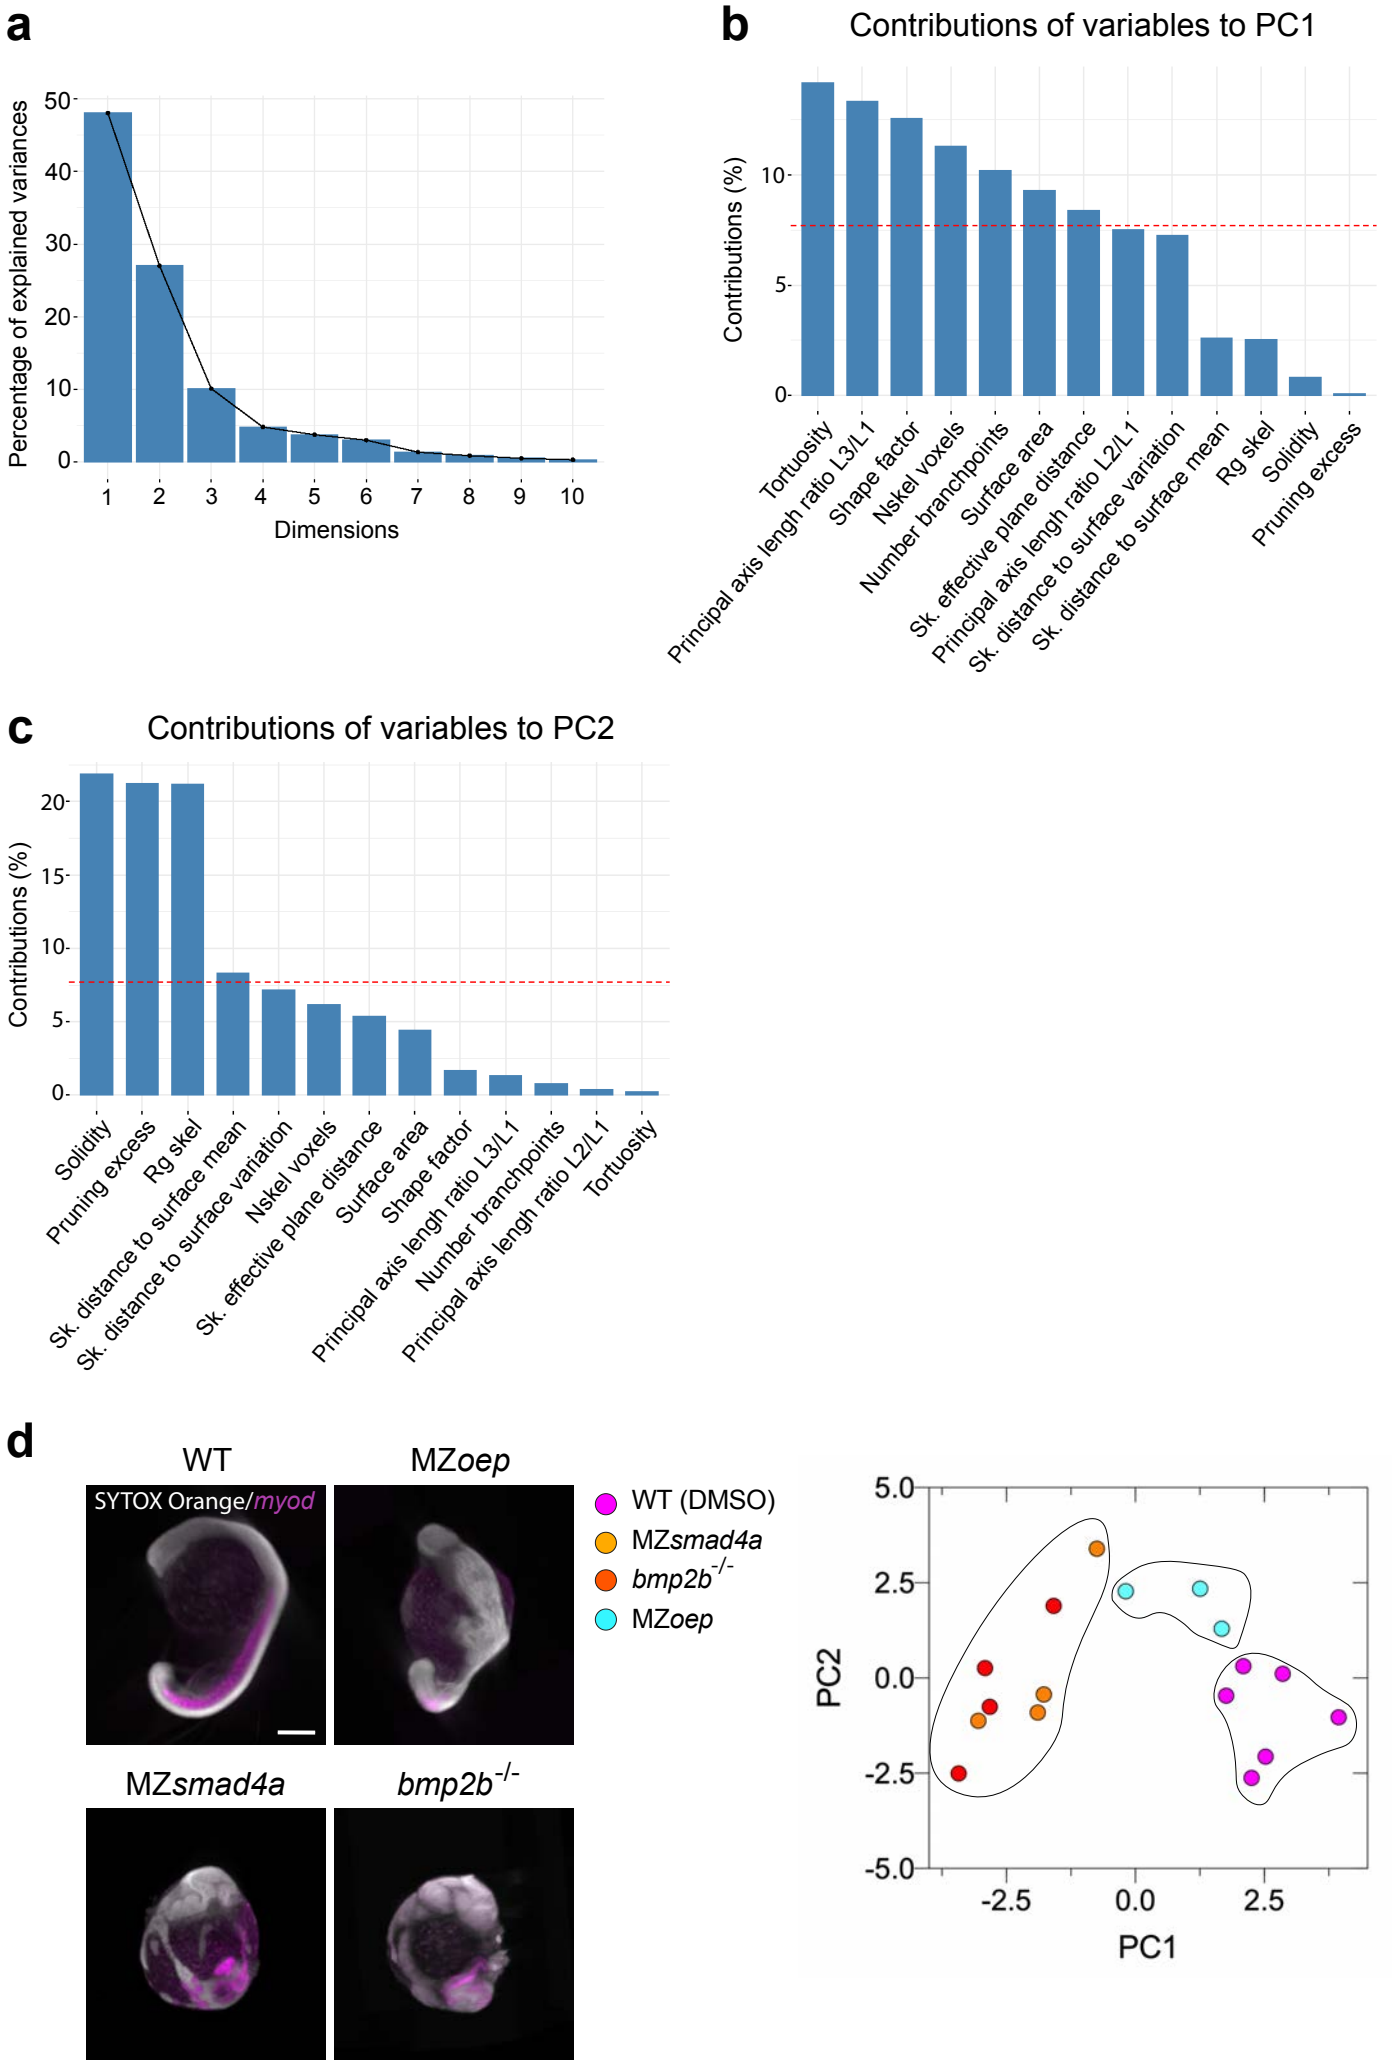

Supplementary Fig. 8



**Supplementary Fig. 8. Defining BMP morphospace.** **a** Scree plot showing the contribution of the different Principal Components (PCs) to the total explained variance. **b** Bar plot showing the contribution of the different variables to the PC1 axes. Red dotted line indicates the expected value if the contribution were uniform. **c** Bar plot showing the contribution of the different variables to the PC2 axes. Red dotted line indicates the expected value if the contribution were uniform. **d** Rendering of 3D OPT image data of WT and MZ*smad4a* embryos compared to Nodal (MZ*oep*) and BMP (*bmp2b*<sup>-/-</sup>) mutants. Staining shows *myod* expression (magenta). Scale bar corresponds to 195 μm. Right panel shows MZ*oep* embryos falling on a different region of the morphospace compared to WT, MZ*smad4a* and *bmp2b*<sup>-/-</sup> mutants.

**Supplementary Table I - Oligonucleotides**

| <b>Gene target</b>       | <b>Purpose</b>                       | <b>Oligonucleotide</b>                    |
|--------------------------|--------------------------------------|-------------------------------------------|
| <b>Zebrafish primers</b> |                                      |                                           |
| <i>smad4a</i>            | CRISPR/Cas9 gRNA Fwd oligonucleotide | taggCGGCGCGGGACGGCGGGTGC                  |
|                          | CRISPR/Cas9 gRNA Rev oligonucleotide | aaacGCACCCGCCGTCCCGCGCCG                  |
| <i>smad4a</i>            | PCR, forward primer (genotyping)     | TCAGGGCTGATGGTGAAGGAT                     |
|                          | PCR, reverse primer (genotyping)     | TGCTAACATTTGAGCGATGCGT                    |
| <i>smad4a</i>            | Sequencing primer (genotyping)       | GATGCTGGAGAAGGCGGAG                       |
| <i>smad4a</i>            | PCR, forward primer (cloning)        | CGCGatcgatCATTACAGTACACAGAACAGTGC         |
|                          | PCR, reverse primer (cloning)        | GCGCctcgagTGTCGTGACCTCTGACCCTG            |
| <i>smad4b</i>            | PCR, forward primer                  | CGCGggatccTGAAGCTCGGGAGGATCGAA            |
|                          | PCR, reverse primer                  | GCGCctcgagCACATGAATCCGCCCTGTG             |
| <i>tbx16</i>             | PCR forward primer (probe synthesis) | GATCCCGAGCGAGTTGCAAAG                     |
|                          | PCR reverse primer (probe synthesis) | TAATACGACTCACTATAGGGGTACCGGGCGAC TTCGTGTG |
| <i>lft2</i>              | qPCR, forward primer                 | GGACATGGGCGCACCAGAACT                     |
|                          | qPCR, reverse primer                 | TACCCGGCCGGCTCGATGAT                      |
| <i>lft1</i>              | qPCR, reverse primer                 | GCTGGTGCTTTACACACTCAACCT                  |
|                          | qPCR, reverse primer                 | GTTCCCTGCAGCACATTTACAG                    |
| <i>eve1</i>              | qPCR, forward primer                 | ATGCCAGAGGACAGGGAGTT                      |
|                          | qPCR, reverse primer                 | GAGTCAGCTGTTCCCTCGTG                      |
| <i>dlx3b</i>             | qPCR, forward primer                 | GATGGGGGCAACACCCGGAG                      |
|                          | qPCR, reverse primer                 | TGTGGTGGCGTCTGCAGGTC                      |
| <i>ndr1</i>              | qPCR, forward primer                 | CTCCGTCTTGAGCCTCGTCG                      |
|                          | qPCR, reverse primer                 | TCGCTGGACGTCATCGCTTG                      |
| <i>ndr2</i>              | qPCR, forward primer                 | AATGCATACCGGTGCGAGGG                      |
|                          | qPCR, reverse primer                 | GCAGGAACACGACTGGGGTG                      |
| <i>noto</i>              | qPCR, forward primer                 | CTGTTGGCATCTGCTCTCCA                      |
|                          | qPCR, reverse primer                 | TCTCCATTTGATGCGCCTGT                      |

|                      |                                                                 |                                                                     |
|----------------------|-----------------------------------------------------------------|---------------------------------------------------------------------|
| <i>tbxta</i>         | qPCR, forward primer                                            | AAGACGCGGAGTTGTGGACC                                                |
|                      | qPCR, reverse primer                                            | ACTGGCTCTGAGCACGGGAA                                                |
| <i>smad4a</i>        | qPCR, forward primer                                            | CGGATCTGTCTGGAGGAATCG                                               |
|                      | qPCR, reverse primer                                            | TCTTTAATGCTCTGCCGGGG                                                |
| <i>smad4b</i>        | qPCR, forward primer                                            | CGCCTGACACTTTCAACAGC                                                |
|                      | qPCR, reverse primer                                            | AGGAATGCTGGGAGGAAAGC                                                |
| <i>actin</i>         | qPCR, forward primer                                            | CGAGCTGTCTTCCCATCCA                                                 |
|                      | qPCR, reverse primer                                            | TCACCAACGTAGCTGTCTTTCTG                                             |
| <b>Human primers</b> |                                                                 |                                                                     |
| <i>ID3</i>           | Top <i>ID3</i> WT (DNA pulldown assay)                          | 5'biotin-<br>TTGATCTAAGACTCAGCCCCAGACAGCCTGGC<br>GCCAGGGTGGGACGTCA  |
|                      | Bottom <i>ID3</i> WT (DNA pulldown assay)                       | TGACGTCCCACCCTGGCGCCAGGCTGTCTGGG<br>GCTGAGTCTTAGATCAA               |
| <i>ID3</i>           | Top <i>ID3</i> Mut (DNA pulldown assay)                         | 5' biotin-<br>TTGATCTAATATTCAGCCCCATATAGCCTATATA<br>TAGGGTGGGACGTCA |
|                      | Bottom <i>ID3</i> Mut (DNA pulldown assay)                      | TGACGTCCCACCCTATATATAGGCTATATGGGG<br>CTGAATATTAGATCAA               |
|                      | Top mutated competitive oligonucleotide (DNA pulldown assay)    | GGATTTGCTAATGATATAGTAATATATATATA<br>TACATATATATATATTGATCTTCA        |
|                      | Bottom mutated competitive oligonucleotide (DNA pulldown assay) | TGAAGATCAATATATATATATGTATATATATA<br>TATTACTATATCATTAGCAAATCC        |
| <i>BMP4</i>          | PCR, forward primer (cloning)                                   | CGCGggatccTTTCTGTCAAGACACCATGATTCC                                  |
|                      | PCR, reverse primer (cloning)                                   | GCGCctcgagTATCCTCAAGGACTGCCTGATCT                                   |
| <b>Mouse primers</b> |                                                                 |                                                                     |
| <i>Smad4</i>         | CRISPR/Cas9 gRNA Fwd oligonucleotide                            | CACCGACAACCCGCTCATAGTGATA                                           |
|                      | CRISPR/Cas9 gRNA Rev oligonucleotide                            | AAACTATCACTATGAGCGGGTTGTC                                           |
| <i>Smad4</i>         | <i>Smad4</i> Forward primer for clone screening                 | GGAGCTGTAGCCTTCAGTTAGCT                                             |

|               |                                                 |                          |
|---------------|-------------------------------------------------|--------------------------|
|               | <i>Smad4</i> Reverse primer for clone screening | AGGCACGCTGGTGTATGTCTCTA  |
| <i>Gapdh</i>  | qPCR, forward primer                            | TCTTGTGCAGTCCCAGCCT      |
|               | qPCR, reverse primer                            | CAATATGGCCAAATCCGTTCA    |
| <i>Lefty1</i> | qPCR, forward primer                            | GCTCGATCAACCGCCAGTCCTG   |
|               | qPCR, reverse primer                            | GCCACCTCTCGAAGGTTCTGGCT  |
| <i>Lefty2</i> | qPCR, forward primer                            | AGAGATGACCTCCTTGCCCA     |
|               | qPCR, reverse primer                            | ACAGATCTATCCCCCTGGGT     |
| <i>T</i>      | qPCR, forward primer                            | TGTGACCAAGAACGGCAGGAGG   |
|               | qPCR, reverse primer                            | CAGCGGTGGTTGTCAGCCGT     |
| <i>Id1</i>    | qPCR, forward primer                            | GCGAGATCAGTGCCTTGG       |
|               | qPCR, reverse primer                            | CTCCTGAAGGGCTGGAGTC      |
| <i>Id2</i>    | qPCR, forward primer                            | GCAGATCGCCCTGGACTCGC     |
|               | qPCR, reverse primer                            | CAGATGCCTGCAAGGACAGGATGC |
| <i>Id3</i>    | qPCR, forward primer                            | CCTCCCGAACGCAGGTGCTG     |
|               | qPCR, reverse primer                            | CATGCCCTCAGGCTTCCGGC     |

**SUPPLEMENTARY TABLE 2 - KEY RESOURCES**

| REAGENT or RESOURCE                                                     | SOURCE                    | IDENTIFIER                                                 |
|-------------------------------------------------------------------------|---------------------------|------------------------------------------------------------|
| <b>Antibodies</b>                                                       |                           |                                                            |
| Anti-phospho-Smad2 (IF) (Dilution: 1 in 800)                            | Cell Signaling Technology | Cat# 8828;<br>RRID: AB_2631089                             |
| Anti-phospho-Smad2 (WB) (Dilution: 1 in 250)                            | Cell Signaling Technology | Cat# 3108<br>RRID: AB_490941                               |
| Anti-phospho-Smad1/5 (IF, WB) (Dilution: 1 in 800 (IF); 1 in 1000 (WB)) | Cell Signaling Technology | Cat# 13820;<br>RRID: AB_2493181                            |
| Anti-SMAD2/3 [clone 18] (WB) (Dilution: 1 in 1000)                      | BD Biosciences            | Cat#610842; RRID: AB_398161                                |
| Anti-SMAD4 [B-8] (WB) (Dilution: 1 in 500)                              | Santa Cruz Biotechnology  | Cat# sc-7966<br>RRID: AB_627905                            |
| Anti-SMAD5 (WB) (Dilution: 1 in 2000)                                   | Proteintech               | Cat# 12167-1-AP<br>RRID: AB_2286502                        |
| Anti-MCM6 [H-8] (WB) (Dilution: 1 in 2000)                              | Santa Cruz Biotechnology  | Cat# sc-393618<br>RRID: AB_2885187                         |
| Anti-Tubulin [YL1/2] (WB) (Dilution: 1 in 10,000)                       | Abcam                     | Cat# ab6160<br>RRID: AB_305328                             |
| Anti-Digoxigenin HRP ( <i>in situ</i> ) (Dilution: 1 in 500)            | Roche                     | Cat# 1207733910                                            |
| Anti-DNP AP ( <i>in situ</i> ) (Dilution: 1 in 1000)                    | Vector Laboratories       | Cat# MB-3100;<br>RRID: AB_2336089                          |
| Anti-Rabbit Alexa Fluor 488 (IF) (Dilution: 1 in 400)                   | ThermoFisher Scientific   | Cat# A-21206;<br>RRID: AB_2535792                          |
| Goat anti-rabbit HRP (WB) (Dilution: 1 in 5000)                         | Dako                      | Cat# P0448<br>RRID: AB_2617138                             |
| Goat anti-mouse HRP (WB) (Dilution: 1 in 5000)                          | Dako                      | Cat# P0447<br>RRID: AB_2617137                             |
| Rabbit anti-rat HRP (WB) (Dilution: 1 in 5000)                          | Dako                      | Cat# P0450<br>RRID: AB_2630354                             |
| <b>Chemicals, Peptides, and Recombinant Proteins</b>                    |                           |                                                            |
| SB-505124                                                               | Tocris                    | Cat# S4696                                                 |
| DMH1                                                                    | Selleck Chemicals         | Cat# S7146                                                 |
| Fast Red TR/Naphthol AS-MX Tablets                                      | Sigma                     | Cat# F4648                                                 |
| Tyramine hydrochloride                                                  | Sigma                     | Cat# T2879                                                 |
| NHS-Fluorescein ester                                                   | ThermoFisher Scientific   | Cat# 46410                                                 |
| Fast Blue BB Salt                                                       | Sigma                     | Cat# F3378                                                 |
| Naphthol AS-MX phosphate disodium salt (NAMP)                           | Sigma                     | Cat# N5000                                                 |
| Pierce NeutrAvidin Agarose (DNAP and peptide pulldown assay)            | ThermoFisher Scientific   | Cat# 29200                                                 |
| Human recombinant BMP4                                                  | Peprotech                 | Cat# 120-05ET                                              |
| Human recombinant Activin A                                             | Peprotech                 | Cat# 120-14E                                               |
| DMEM/F-12                                                               | ThermoFisher Scientific   | Cat# 10565018                                              |
| Digoxigenin (Dig)-11-UTP                                                | Roche                     | Cat# 11209256910                                           |
| dinitrophenol (DNP)-11-UTP                                              | Perkin Elmer              | Cat# NEL555001EA                                           |
| DAPI                                                                    | Sigma Aldrich             | Cat# 10236276001                                           |
| TRIzol                                                                  | ThermoFisher Scientific   | Cat# 15596026                                              |
| MO- <i>smad4b</i> GACATGCTGCTGGATTTACTCAA                               | Gene Tools, LLC           | <a href="http://www.gene tools.com">www.gene tools.com</a> |
| mpMO- <i>smad4b</i> GAGATCCTGCTCGATTAAGACTCAA                           | Gene Tools, LLC           | <a href="http://www.gene tools.com">www.gene tools.com</a> |
| <b>Critical Commercial Assays</b>                                       |                           |                                                            |
| Multiplex Fluorescent Assay v2                                          | ACDBio                    | <a href="http://acdbio.com">acdbio.com</a>                 |
| Power-Up SYBR Green Master Mix                                          | ThermoFisher Scientific   | Cat# A25742                                                |

| <b>Deposited Data</b>                                                                                                            |                                          |                                                                                                                                         |
|----------------------------------------------------------------------------------------------------------------------------------|------------------------------------------|-----------------------------------------------------------------------------------------------------------------------------------------|
| Bulk RNA-seq raw data. Accession number: GSE162289                                                                               | Gene Expression Omnibus                  | <a href="https://www.ncbi.nlm.nih.gov/geo/query/acc.cgi?acc=GSE162289">https://www.ncbi.nlm.nih.gov/geo/query/acc.cgi?acc=GSE162289</a> |
| Sc-RNA-seq raw data. Accession number: GSE164574                                                                                 | Gene Expression Omnibus                  | <a href="https://www.ncbi.nlm.nih.gov/geo/query/acc.cgi?acc=GSE164574">https://www.ncbi.nlm.nih.gov/geo/query/acc.cgi?acc=GSE164574</a> |
| <b>Experimental Models: Cell Lines</b>                                                                                           |                                          |                                                                                                                                         |
| HaCaT cells, human                                                                                                               | Francis Crick Institute Cell Services    |                                                                                                                                         |
| HaCaT SMAD4 KO, human                                                                                                            | Gori et al., 2021<br>PMID: 33416497      |                                                                                                                                         |
| E14-TG2a cells carrying a <i>Hhex</i> -RedStar/ <i>Gsc</i> -GFP, mouse                                                           | Villegas et al., 2013<br>PMID: 24368729  |                                                                                                                                         |
| E14-TG2a cells carrying a <i>Hhex</i> -RedStar/ <i>Gsc</i> -GFP SMAD4 KO, mouse                                                  | This paper                               |                                                                                                                                         |
| <b>Experimental Models: Organisms/Strains</b>                                                                                    |                                          |                                                                                                                                         |
| Zebrafish <i>Danio rerio</i> : WT                                                                                                |                                          |                                                                                                                                         |
| Zebrafish <i>Danio rerio</i> : MZ <i>smad4a</i> <sup>Δ14</sup> , M <i>smad4a</i> <sup>Δ14</sup> , Z <i>smad4a</i> <sup>Δ14</sup> | This Paper                               |                                                                                                                                         |
| Zebrafish <i>Danio rerio</i> : <i>bmp2b</i> <sup>tdc24</sup> ( <i>swirl</i> )                                                    | Hammond et al., 2009<br>PMID: 19190757   |                                                                                                                                         |
| Zebrafish <i>Danio rerio</i> : MZ <i>oep</i>                                                                                     | Gritsman et al, 1999<br>PMID: 10199408   |                                                                                                                                         |
| <b>Oligonucleotides</b>                                                                                                          |                                          |                                                                                                                                         |
| For the list of oligonucleotides used see Supplementary Table 1                                                                  |                                          |                                                                                                                                         |
| <b>Recombinant DNA</b>                                                                                                           |                                          |                                                                                                                                         |
| pCS2-hBMP4: for mRNA digest NotI, transcribe SP6                                                                                 | This Paper                               | N/A                                                                                                                                     |
| pCS2-z <i>smad4b</i> : for mRNA digest NotI, transcribe SP6                                                                      | This Paper                               | N/A                                                                                                                                     |
| pCS2-z <i>smad4a</i> : for mRNA digest Apal, transcribe SP6                                                                      | This Paper                               | N/A                                                                                                                                     |
| pCS2-H2B_PSmOrange: for mRNA synthesis linearize with NotI; polymerase SP6                                                       | Beretta et al., 2013<br>PMID: 24067090   | N/A                                                                                                                                     |
| pFTX5-H <i>Smad4</i> : for mRNA synthesis linearize with: XbaI; polymerase T7                                                    | Howell et al., 1999<br>PMID: 10525340    | N/A                                                                                                                                     |
| pT7-gRNA for mRNA synthesis linearize with: BamH1; polymerase T7                                                                 | Jao et al., 2013<br>PMID: 23918387       | N/A                                                                                                                                     |
| pT3TS-nls-zCas9-nls for mRNA synthesis linearize with: XbaI; polymerase T3                                                       | Jao et al., 2013<br>PMID: 23918387       | N/A                                                                                                                                     |
| pSpCas9(BB)-2A-GFP (PX458)                                                                                                       | Ran et al 2013<br>PMID: 24157548         | N/A                                                                                                                                     |
| <b>Software and Algorithms</b>                                                                                                   |                                          |                                                                                                                                         |
| FIJI (ImageJ)                                                                                                                    | Schneider et al., 2012<br>PMID: 22930834 | <a href="https://imagej.net/Fiji/Downloads">https://imagej.net/Fiji/Downloads</a>                                                       |
| Imaris                                                                                                                           | Oxford instruments                       | <a href="https://imaris.oxinst.com/">https://imaris.oxinst.com/</a>                                                                     |
| Icy                                                                                                                              | Institut Pasteur and France-Bioimaging   | <a href="http://icy.bioimageanalysis.org/">http://icy.bioimageanalysis.org/</a>                                                         |
| Matlab                                                                                                                           | MathWorks                                | <a href="https://www.mathworks.com/products/matlab.html">https://www.mathworks.com/products/matlab.html</a>                             |
| R                                                                                                                                | The R Foundation                         | <a href="https://www.r-project.org/">https://www.r-project.org/</a>                                                                     |

|                                                                  |                                                                                                              |                                                                                                                       |
|------------------------------------------------------------------|--------------------------------------------------------------------------------------------------------------|-----------------------------------------------------------------------------------------------------------------------|
| Prism                                                            | GraphPad                                                                                                     | <a href="https://www.graphpad.com/scientific-software/prism/">https://www.graphpad.com/scientific-software/prism/</a> |
| <b>Other</b>                                                     |                                                                                                              |                                                                                                                       |
| Dr- <i>lft1</i> probe (RNAscope)                                 | ACDBio                                                                                                       | Cat# 557771-C2                                                                                                        |
| Dr- <i>ndr1</i> probe (RNAscope)                                 | ACDBio                                                                                                       | Cat# 557761-C1                                                                                                        |
| Antisense RNA probe <i>tbxta</i> : linearize Xho1: polymerase T7 | Schulte-Merker et al., 1992<br>PMID: 7600949                                                                 | N/A                                                                                                                   |
| Antisense RNA probe <i>sox32</i> : linearize Not1: polymerase T7 | <a href="https://zfin.org/ZDB-PUB-010810-1">https://zfin.org/ZDB-PUB-010810-1</a><br>ZFIN online publication | N/A                                                                                                                   |
| Antisense RNA probe <i>myod</i> : linearize Xba1: polymerase T7  | Weinberg et al., 1996<br>PMID: 8565839                                                                       | N/A                                                                                                                   |
| Antisense RNA probe <i>otx2</i> : linearize EcoRI: polymerase T7 | Li et al., 1994<br>PMID: 7893604                                                                             | N/A                                                                                                                   |
| Antisense RNA probe <i>chrd</i> : linearize Spe1; polymerase T7  | Miller-Bertoglio et al 1997<br>PMID:9441687                                                                  | N/A                                                                                                                   |
